# Supplementary material
Source: MDPI journal article supplement (https://www.mdpi.com/1999-4907/10/2/153)
Supplement: s1 [file s1]

## Supplementary Materials

**Table S1.** Start and end dates for the dry season and the length (in days) of the dry and wet seasons for 2014, 2015, and 2016.

| Year | Dry Season        |              | Season Length |     |
|------|-------------------|--------------|---------------|-----|
|      | Start             | End          | Dry           | Wet |
| 2014 | December 21, 2013 | May 6, 2014  | 136           | 222 |
| 2015 | December 14, 2014 | May 16, 2015 | 148           | 195 |
| 2016 | November 27, 2015 | May 18, 2016 | 173           | 223 |

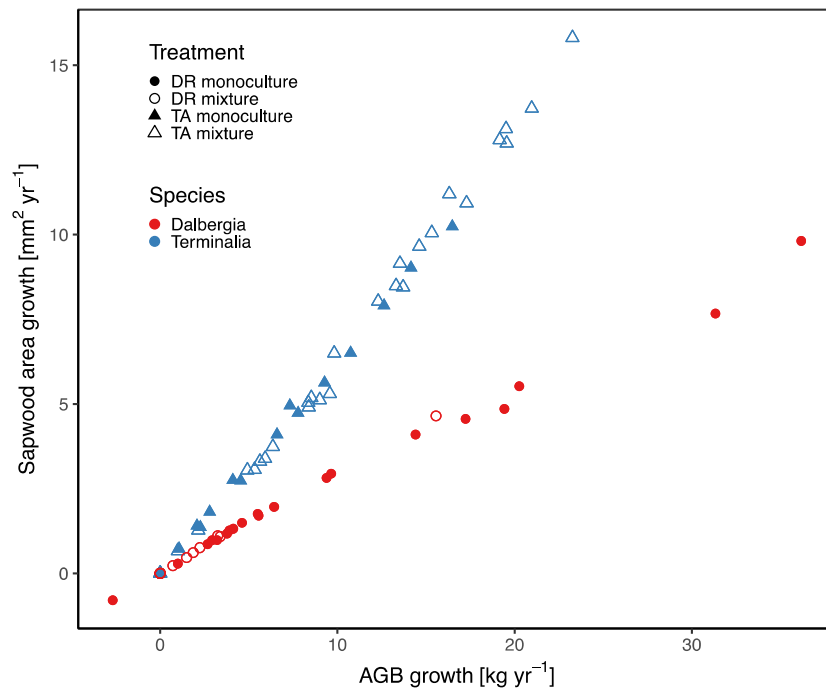

**Figure S1.** Relationship between aboveground biomass growth (AGB) and sapwood area growth for all study trees.

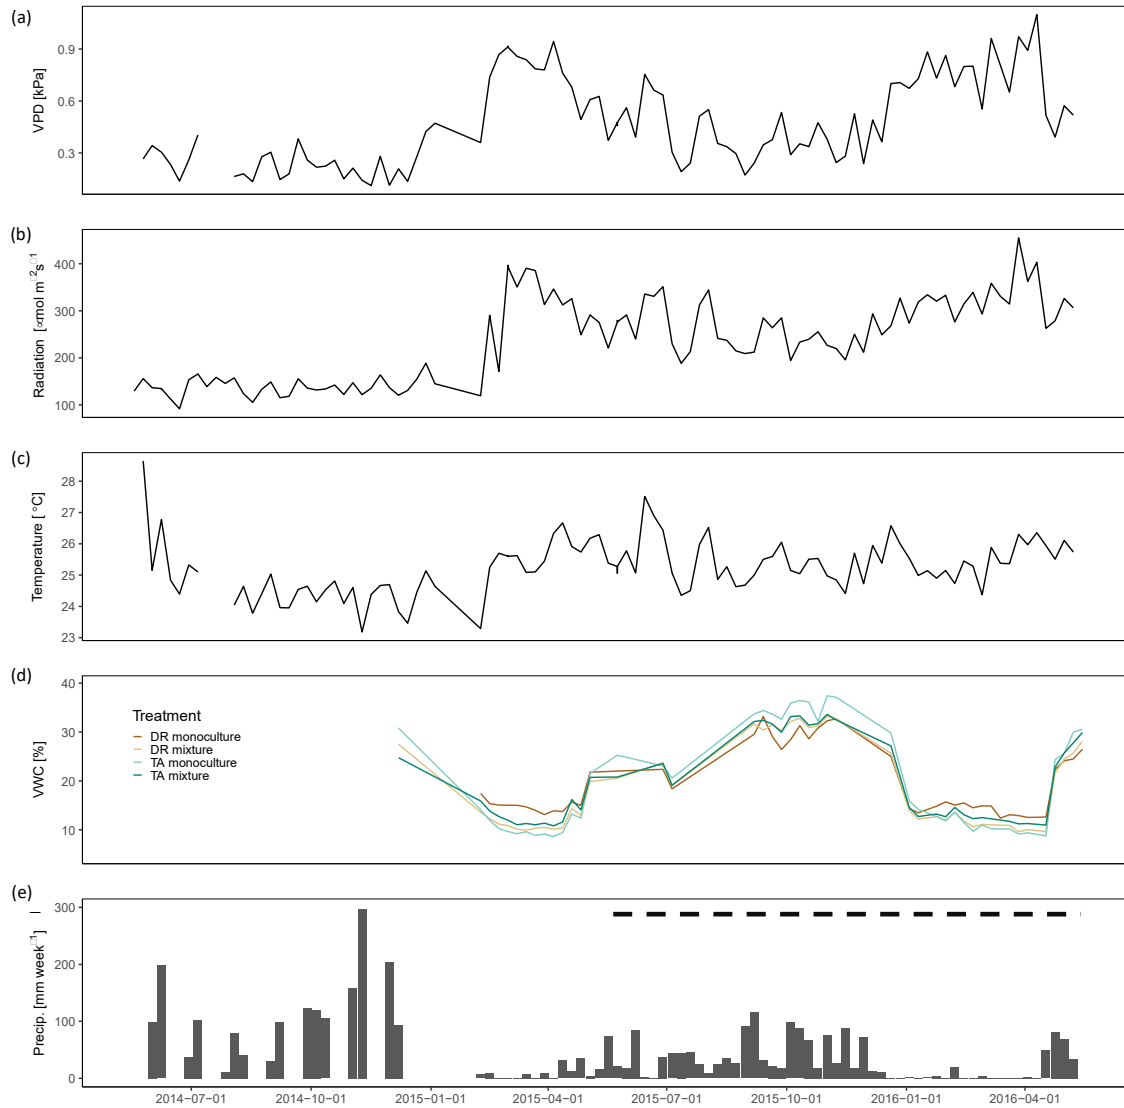

**Figure S2. Weekly averages of (a) vapor pressure deficit (VPD; kPa), (b) radiation ( $\mu\text{mol m}^{-2}\text{s}^{-1}$ ), (c) temperature ( $^{\circ}\text{C}$ ), (d) volumetric water content (VWC, %), and weekly sum of (e) precipitation ( $\text{mm week}^{-1}$ ). Colored lines for VWC represent averages of individual trees for the four treatments. DR monoculture: *D. retusa* trees in monocultures; DR mixture: *D. retusa* trees in mixtures; TA monoculture: *T. amazonia* in monocultures TA mixture: *T. amazonia* in mixtures. Shaded grey area represents the dry season. The dashed black line represents the drought.**

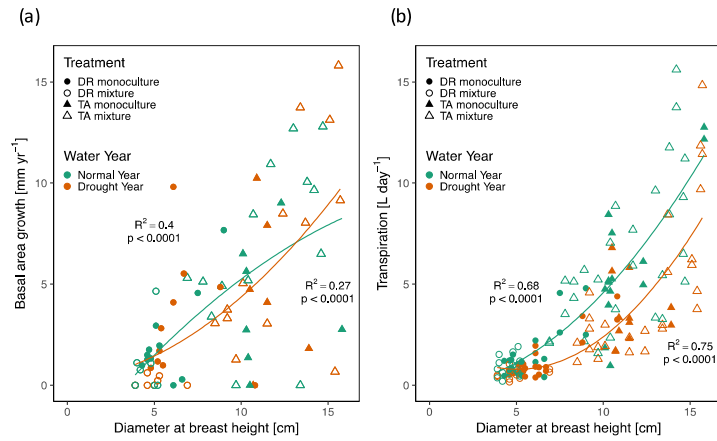

**Figure S3.** (a) Tree-level diameter at breast height (cm) versus sapwood area growth (mm<sup>2</sup>yr<sup>-1</sup>) and (b) diameter at breast height by transpiration (L day<sup>-1</sup>) by treatment for drought (orange) and normal (green) years. Lines represent best fit polynomial models. The treatments include: DR monoculture: *D. retusa* trees in monocultures (filled circle, n = 9); DR mixture: *D. retusa* trees in mixtures (open circle, n = 10); TA monoculture: *T. amazonia* in monocultures (filled triangle, n = 8); TA mixture: *T. amazonia* in mixtures (open triangle, n = 11). Each point represents an individual tree.
